# Supplementary material for: Globalizing the Science Curriculum: An Undergraduate Course on Traditional Chinese Medicine as a Complementary Approach to Western Medicine
Source: Atypon-hosted journal article supplement (doi:10.1187/cbe.08-01-0001), 2008-06-01
Supplement: suppa.pdf [file suppa.pdf]

## APPENDIX A. COURSE SCHEDULE

| <u>Session</u> | <u>Topic</u>                                                               |
|----------------|----------------------------------------------------------------------------|
| 1              | Introduction. TCM and Western medicine                                     |
| 2              | Overview of Western medicine                                               |
| 3              | Western medicine: clinical trials                                          |
| 4              | TCM: historical overview                                                   |
| 5              | TCM theory. Diagnosis                                                      |
| 6              | Asian art: a window into culture                                           |
| <b>7</b>       | <b>Role Play #1</b>                                                        |
| 8              | *Food, health and medicine                                                 |
| 9              | <b>Student presentations x 3. Assignment #1 due.</b>                       |
| 10             | <b>Student presentations x 3</b>                                           |
| 11             | TCM: the pharmacopeia                                                      |
| 12             | Acupuncture theory.                                                        |
| 13             | Acupuncture. Therapeutic applications.                                     |
| 14             | <b>*Acupuncture demonstration</b>                                          |
| 15             | <b>* Tai Chi</b>                                                           |
| 16             | <b>Role Play #2</b>                                                        |
| 17             | Modernization of TCM                                                       |
| 18             | Infectious diseases. *Preparation of Dermagen.                             |
| 19             | Dermagen prep. (cont). Concept of Synergy.                                 |
| 20             | <b>Student presentations x 3. Assignment #2 due.</b>                       |
| 21             | <b>Student presentation.</b> Societal constraints: regulatory framework.   |
| 22             | Integrative medicine: cancer, hepatitis.                                   |
| 23             | <b>Role Play #3</b>                                                        |
| 24             | TCM: medical views                                                         |
| 25             | Societal constraints: patents, commercialization.                          |
| 26             | <b>Role Play #4</b>                                                        |
| 27             | <b>Final presentations x 3 (teams of two students). Assignment #3 due.</b> |
| 28             | <b>Final presentations x 2 (teams of two students)</b>                     |
| 29             | <b>Role Play #5</b>                                                        |

\* indicates sessions where students experience TCM practices. Bold indicates student exercises.
